# Supplementary material for: Convolutional Neural Network Shows Greater Spatial and Temporal Stability in Multi-Annual Land Cover Mapping Than Pixel-Based Methods
Source: MDPI journal article supplement (doi:10.3390/rs15082132), 2023-04-18
Supplement: s1 [file s1]

# Convolutional neural network shows greater spatial and temporal stability in multi-annual land cover mapping than pixel-based methods

## Supplementary Material

Table S1. 2015-2016 transition statistics: No change (**bold**), possible change (plain text), and unlikely (*italics*) and implausible (underlined) changes showing class transitions.

| 2015-2016 transition               | Count             | Percent        |
|------------------------------------|-------------------|----------------|
| <b>No change</b>                   | <b>15,369,786</b> | <b>96.06%</b>  |
| Possible change                    | 454,390           | 2.84%          |
| <i>Forest=&gt;Water</i>            | 26,149            | 0.16%          |
| <i>Horticulture=&gt;Grassland</i>  | 6,502             | 0.04%          |
| <i>Horticulture=&gt;Builtup</i>    | 47                | 0.00%          |
| <i>Plantation=&gt;Water</i>        | 87                | 0.00%          |
| <u>Forest=&gt;Plantation</u>       | <u>33,163</u>     | <u>0.21%</u>   |
| <u>Grassland=&gt;Forest</u>        | <u>25,180</u>     | <u>0.16%</u>   |
| <u>Grassland=&gt;Plantation</u>    | <u>4,329</u>      | <u>0.03%</u>   |
| <u>Horticulture=&gt;Plantation</u> | <u>26</u>         | <u>0.00%</u>   |
| <u>Plantation=&gt;Forest</u>       | <u>27,509</u>     | <u>0.17%</u>   |
| <u>Plantation=&gt;Horticulture</u> | <u>1</u>          | <u>0.00%</u>   |
| <u>Bare=&gt;Forest</u>             | <u>170</u>        | <u>0.00%</u>   |
| <u>Water=&gt;Forest</u>            | <u>6,926</u>      | <u>0.04%</u>   |
| <u>Water=&gt;Plantation</u>        | <u>43</u>         | <u>0.00%</u>   |
| <u>Water=&gt;Built-up</u>          | <u>2,057</u>      | <u>0.01%</u>   |
| <u>Built-up=&gt;Forest</u>         | <u>2,106</u>      | <u>0.01%</u>   |
| <u>Built-up=&gt;Grassland</u>      | <u>40,241</u>     | <u>0.25%</u>   |
| <u>Built-up=&gt;Horticulture</u>   | <u>2</u>          | <u>0.00%</u>   |
| <u>Built-up=&gt;Plantation</u>     | <u>12</u>         | <u>0.00%</u>   |
| <u>Built-up=&gt;Water</u>          | <u>1,274</u>      | <u>0.01%</u>   |
| <b>Total</b>                       | <b>16,000,000</b> | <b>100.00%</b> |

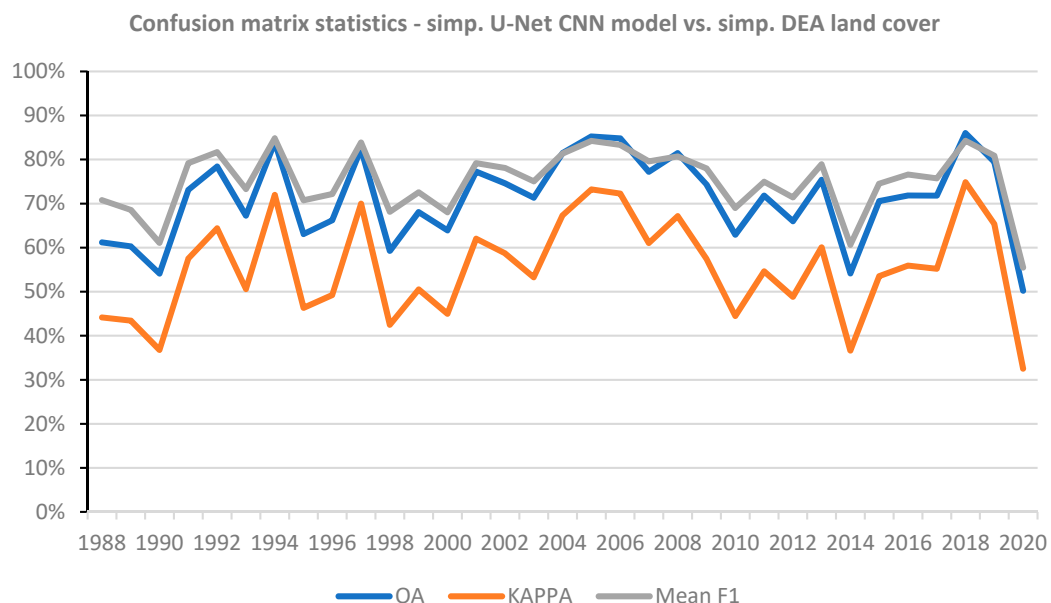

Figure S1. 1998-2020 simplified CNN vs. DEA mapping confusion matrix statistics

**Table S2. Simplified U-Net CNN model vs. simplified DEA Land Cover for 2018. OA=86%, Kappa=75% and weighted-mean F1=84%. Excludes No data pixels.**

| Pixel Count<br>Simp. CNN Model | Simp. DEA Land Cover |                  |                |                |               |               |                   | User's<br>accuracy      | Commission<br>errors    | Total  |
|--------------------------------|----------------------|------------------|----------------|----------------|---------------|---------------|-------------------|-------------------------|-------------------------|--------|
|                                | Forest               | Grassland        | Crop           | Bare           | Water         | Built-up      | Total             |                         |                         |        |
| Forest                         | 6,266,397            | 181,394          | 2,416          | 1,290          | 361           | 15            | 6,451,873         | 97.1%                   | 2.9%                    | 100.0% |
| Grassland                      | 633,863              | 7,314,061        | 386,685        | 32,130         | 977           | 79            | 8,367,795         | 87.4%                   | 12.6%                   | 100.0% |
| Crop                           | 254                  | 1,076            | 384            | 51             | 0             | 0             | 1,765             | 21.8%                   | 78.2%                   | 100.0% |
| Bare                           | 1,557                | 14,113           | 443            | 8,639          | 2,777         | 863           | 28,392            | 30.4%                   | 69.6%                   | 100.0% |
| Water                          | 77,725               | 190,520          | 13,831         | 62,279         | 83,433        | 129           | 427,917           | 19.5%                   | 80.5%                   | 100.0% |
| Built-up                       | 161,054              | 322,386          | 18,493         | 130,340        | 850           | 72,365        | 705,488           | 10.3%                   | 89.7%                   | 100.0% |
| <b>Total</b>                   | <b>7,140,850</b>     | <b>8,023,550</b> | <b>422,252</b> | <b>234,729</b> | <b>88,398</b> | <b>73,451</b> | <b>15,983,230</b> | <b>86.0%</b>            | <b>Overall accuracy</b> |        |
| Producer's acc.                | 87.8%                | 91.2%            | 0.1%           | 3.7%           | 94.4%         | 98.5%         |                   |                         |                         |        |
| Omission errors                | 12.2%                | 8.8%             | 99.9%          | 96.3%          | 5.6%          | 1.5%          |                   |                         |                         |        |
| <b>Total</b>                   | <b>100.0%</b>        | <b>100.0%</b>    | <b>100.0%</b>  | <b>100.0%</b>  | <b>100.0%</b> | <b>100.0%</b> | <b>74.8%</b>      | <b>Kappa</b>            |                         |        |
| <b>F1</b>                      | <b>92.2%</b>         | <b>89.2%</b>     | <b>0.2%</b>    | <b>6.6%</b>    | <b>32.3%</b>  | <b>18.6%</b>  | <b>84.3%</b>      | <b>Weighted-mean F1</b> |                         |        |

**Table S3. Simplified U-Net CNN model vs. simplified DEA Land Cover for 2020. OA=50%, Kappa=33% and weighted-mean F1=56%. Excludes No data pixels.**

| Pixel Count<br>Simp. CNN Model | Simp. DEA Land Cover |                  |                  |                |                |               |                   | User's<br>accuracy      | Commission<br>errors    | Total  |
|--------------------------------|----------------------|------------------|------------------|----------------|----------------|---------------|-------------------|-------------------------|-------------------------|--------|
|                                | Forest               | Grassland        | Crop             | Bare           | Water          | Built-up      | Total             |                         |                         |        |
| Forest                         | 6,208,504            | 349,255          | 24,929           | 38,938         | 4,213          | 21            | 6,625,860         | 93.7%                   | 6.3%                    | 100.0% |
| Grassland                      | 979,452              | 1,441,618        | 5,610,664        | 10,909         | 7,517          | 49            | 8,050,209         | 17.9%                   | 82.1%                   | 100.0% |
| Crop                           | 6,893                | 1,325            | 29,363           | 81             | 2              | 0             | 37,664            | 78.0%                   | 22.0%                   | 100.0% |
| Bare                           | 2,480                | 13,294           | 2,286            | 8,240          | 3,643          | 495           | 30,438            | 27.1%                   | 72.9%                   | 100.0% |
| Water                          | 119,695              | 70,168           | 58,537           | 5,668          | 254,032        | 170           | 508,270           | 50.0%                   | 50.0%                   | 100.0% |
| Built-up                       | 198,520              | 208,820          | 118,320          | 115,449        | 1,938          | 82,625        | 725,672           | 11.4%                   | 88.6%                   | 100.0% |
| <b>Total</b>                   | <b>7,515,544</b>     | <b>2,084,480</b> | <b>5,844,099</b> | <b>179,285</b> | <b>271,345</b> | <b>83,360</b> | <b>15,978,113</b> | <b>50.2%</b>            | <b>Overall accuracy</b> |        |
| Producer's acc.                | 82.6%                | 69.2%            | 0.5%             | 4.6%           | 93.6%          | 99.1%         |                   |                         |                         |        |
| Omission errors                | 17.4%                | 30.8%            | 99.5%            | 95.4%          | 6.4%           | 0.9%          |                   |                         |                         |        |
| <b>Total</b>                   | <b>100.0%</b>        | <b>100.0%</b>    | <b>100.0%</b>    | <b>100.0%</b>  | <b>100.0%</b>  | <b>100.0%</b> | <b>32.5%</b>      | <b>Kappa</b>            |                         |        |
| <b>F1</b>                      | <b>87.8%</b>         | <b>28.4%</b>     | <b>1.0%</b>      | <b>7.9%</b>    | <b>65.2%</b>   | <b>20.4%</b>  | <b>55.5%</b>      | <b>Weighted-mean F1</b> |                         |        |

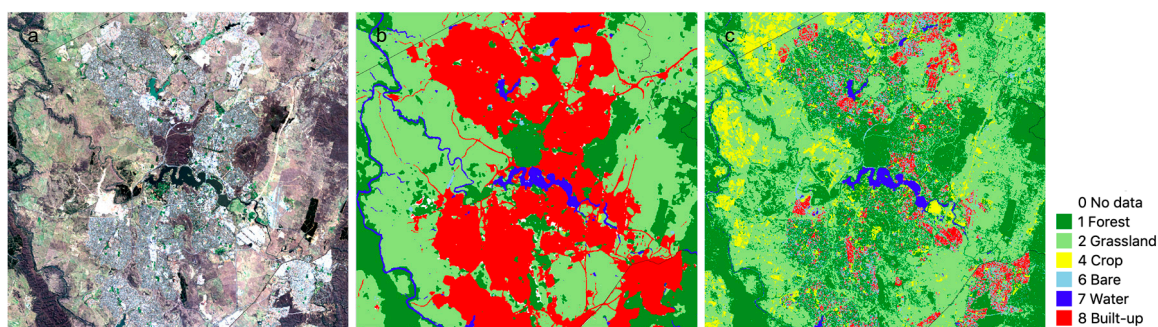

**Figure S2. Simplified U-Net CNN model (b) and simplified DEA Land Cover (c) and input Landsat data as True colour RGB (a) for Canberra urban area in 2013.**

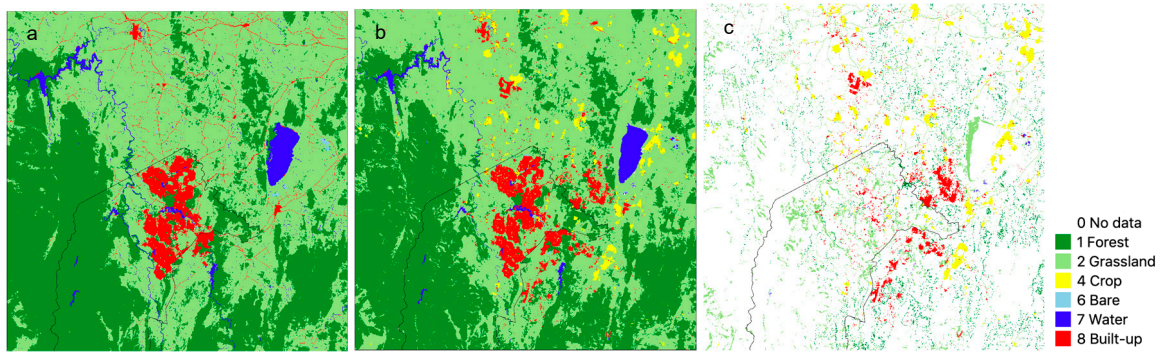

**Figure S3. 2017 simplified U-Net CNN Model (a), simplified ESRI Land Cover (b) and differences (c). Difference map shows ESRI Land Cover classes where they are different to the U-Net CNN model.**

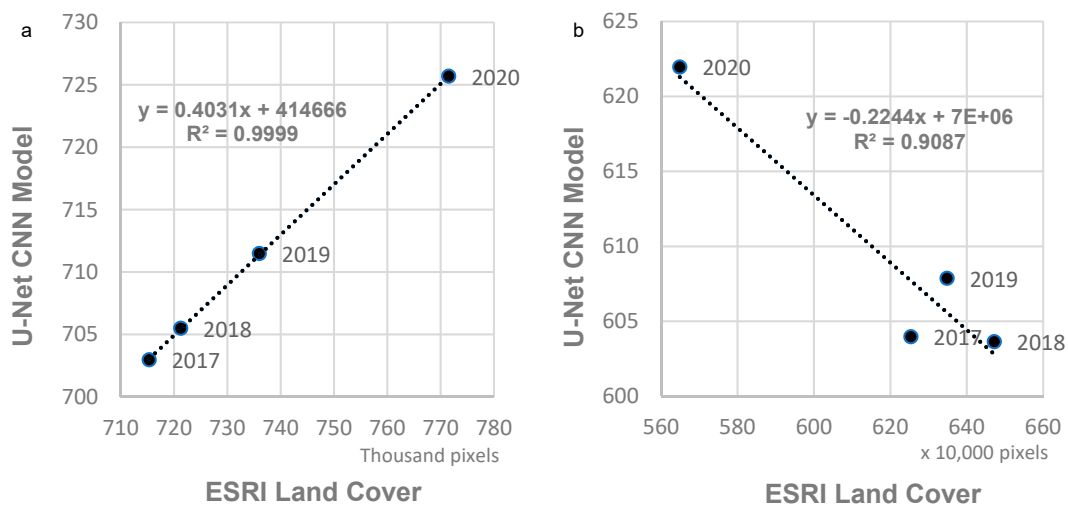

**Figure S4. Relationship between ESRI Land Cover and U-Net CNN model for Built area vs. Built-up (a) and Trees vs. Forest+Plantation (b). Other classes are less well correlated.**
